# Supplementary material for: Biosynthesis of plant hemostatic dencichine in Escherichia coli
Source: PubMed Central journal article supplement (PMC9485241; doi:10.1038/s41467-022-33255-3), 2022-09-19
Supplement: 41467_2022_33255_MOESM1_ESM.pdf [file 41467_2022_33255_MOESM1_ESM.pdf]

**Biosynthesis of plant hemostatic dencichine in *Escherichia coli***

Li *et al.*

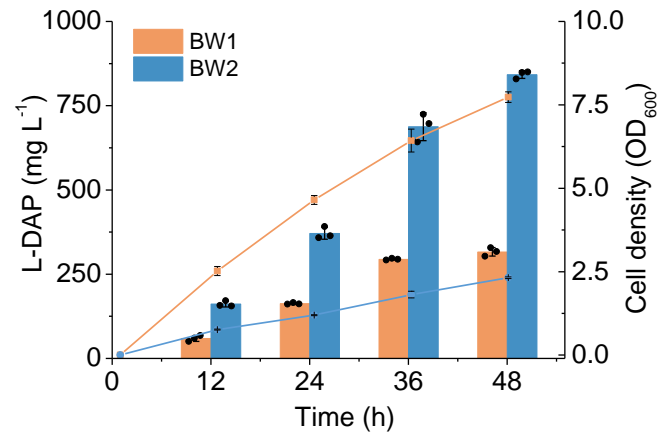

**Supplementary Figure 1. Production and optimization of *L*-DAP by strain BW1 and BW2.**

The bars indicate the titer of *L*-DAP and the lines indicate biomass at OD<sub>600</sub>. Data shown are mean ± SD (n=3 independent experiments). Source data are provided as a Source Data file.

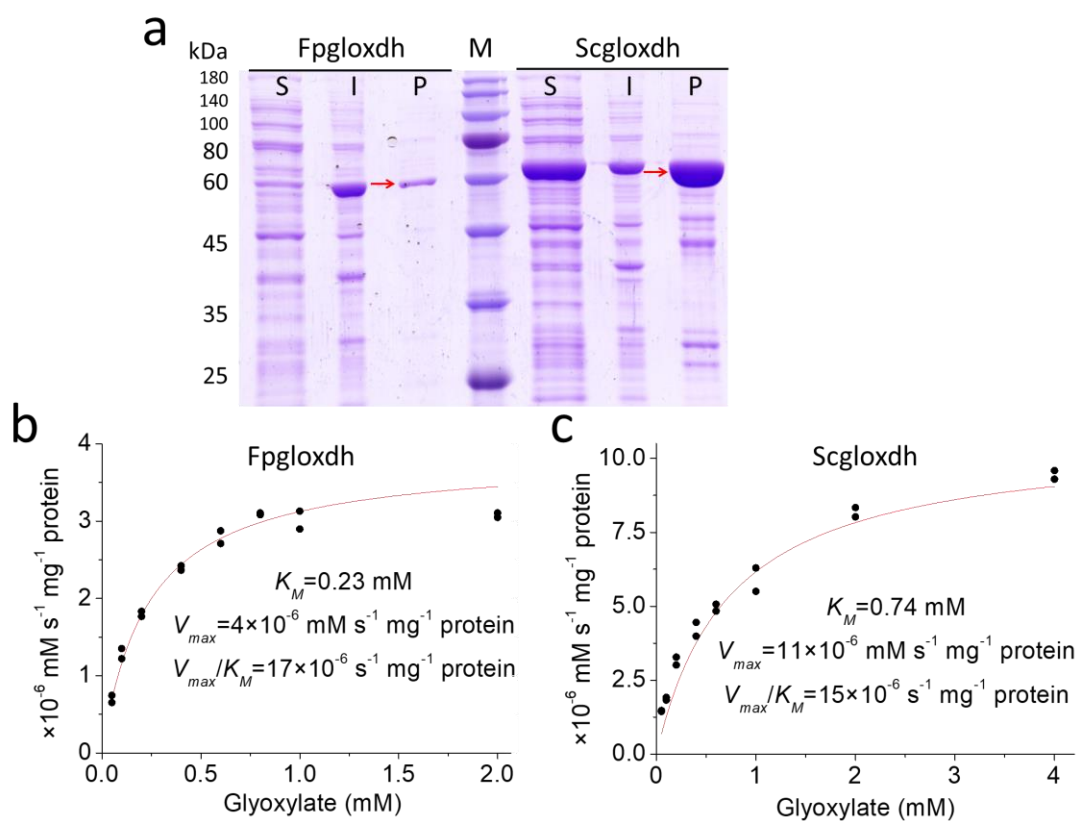

**Supplementary Figure 2. Biochemical analysis of Fpgloxhdh and Scgloxhdh.** **a** SDS-PAGE analysis of nickel-affinity purified codon-optimized His-Fpgloxhdh and wild-type His-Scgloxhdh. This experiment was repeated independently twice with similar results. **b, c** Kinetic analysis of Gloxhdh over a gradient of glyoxylate concentrations ( $n=2$ , data distribution is less than 7.84% in duplicate experiments). Enzyme activity was determined by measurement the production of cytochrome *c* reduced at 550 nm. M, marker II; S, soluble fraction; I, insoluble fraction; P, purified protein. Source data are provided as a Source Data file.

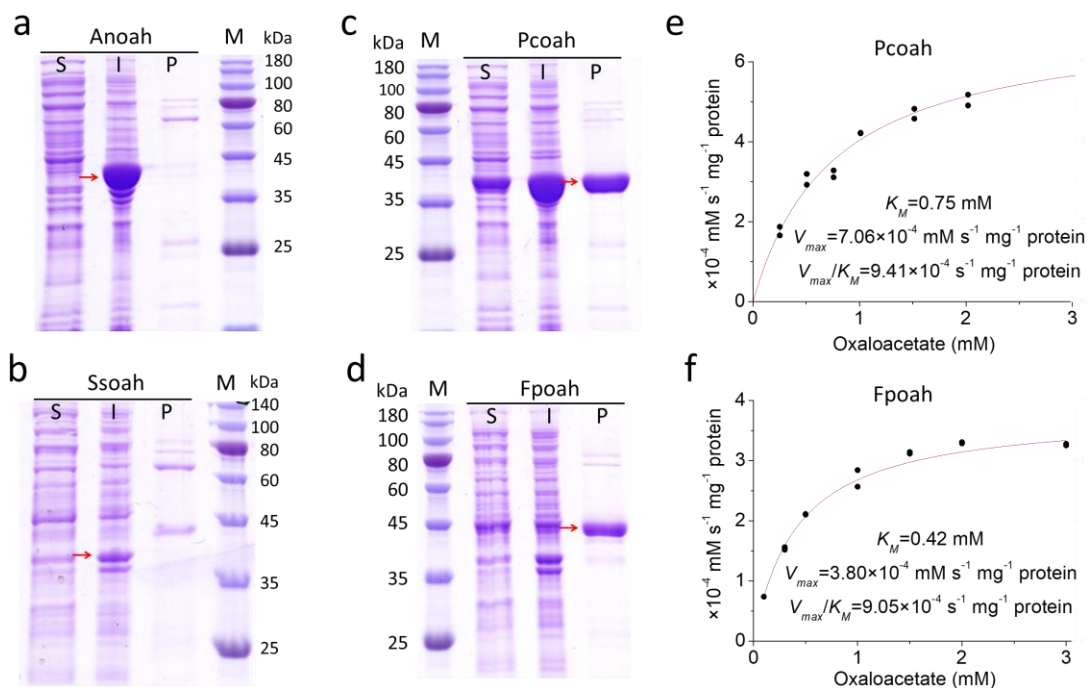

**Supplementary Figure 3. Biochemical analysis of Anoah, Ssoah, Pcoah and Fpoah.** **a, b, c, d** SDS-PAGE analysis of nickel-affinity purified Anoah, Ssoah, Pcoah and Fpoah. This experiment was repeated independently twice with similar results. **e, f** Kinetic analysis of Oah over a gradient of oxaloacetate concentrations ( $n=2$ , data distribution is less than 6.13% in duplicate experiments). Enzyme activity was determined by measurement the consumption of oxaloacetate at 255 nm. M, marker II; S, soluble fraction; I, insoluble fraction; P, purified protein. Source data are provided as a Source Data file.

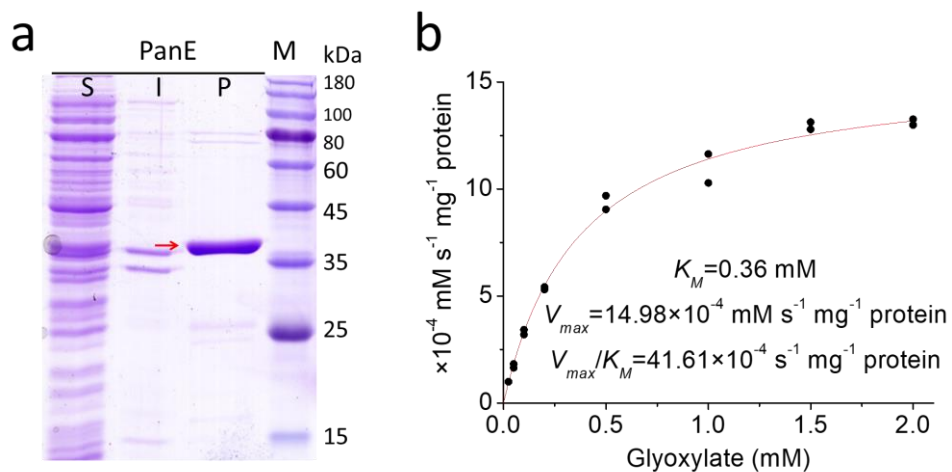

**Supplementary Figure 4. Biochemical analysis of PanE.** **a** SDS-PAGE analysis of nickel-affinity purified PanE. This experiment was repeated independently twice with similar results. **b** Kinetic analysis of PanE over a gradient of glyoxylate concentrations (n=2, data distribution is less than 6.16% in duplicate experiments). Enzyme activity was determined by measurement the production of NADPH at 340 nm. M, marker II; S, soluble fraction; I, insoluble fraction; P, purified protein. Source data are provided as a Source Data file.

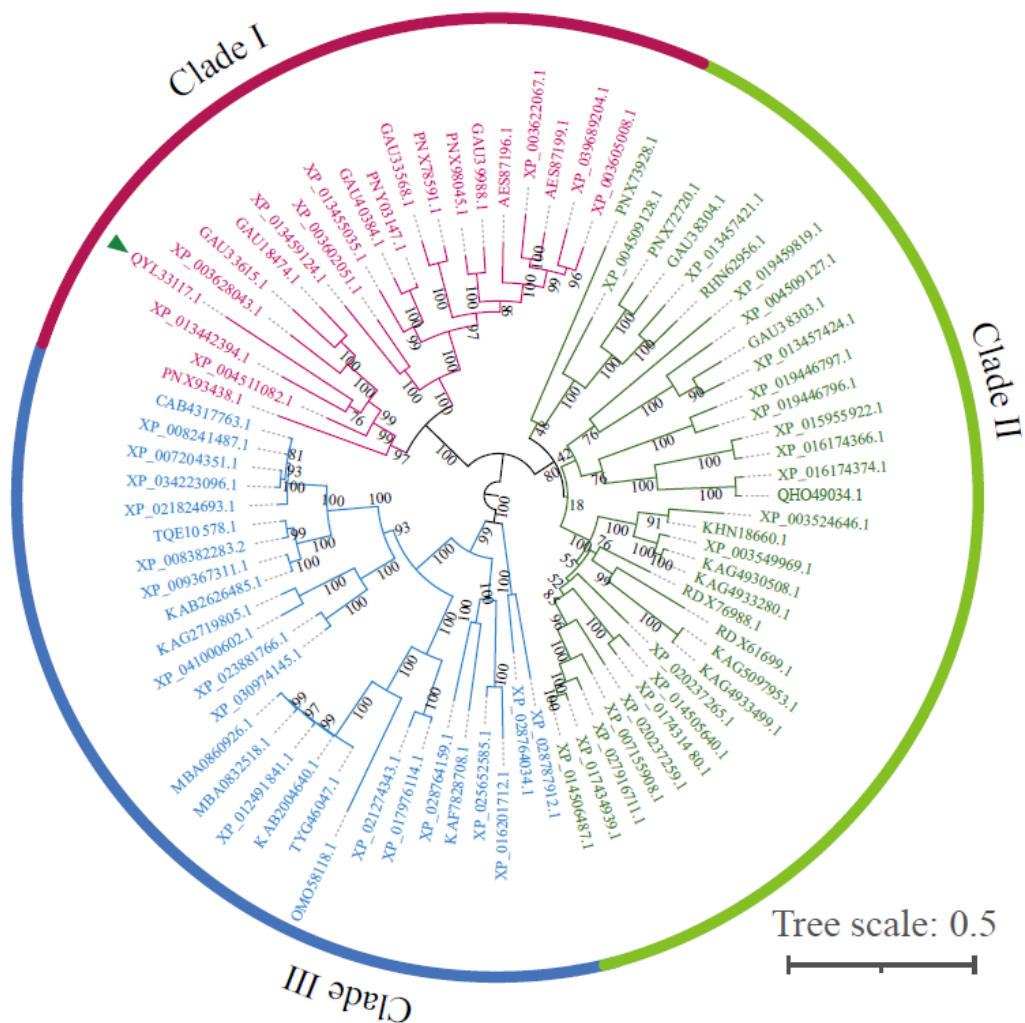

**Supplementary Figure 5. Phylogenetic relationships of LsBAHD in *L. sativus* with sequences encoding highly homologous proteins.** Amino acid sequences were aligned and the Maximum Likelihood (ML) tree was built using MAFFT (version 7.407). The phylogeny was constructed with 1000 implementations of ultrafast bootstrap tests with IQ-TREE. The Model of substitution is JTT+I+G4 (Jones-Taylor-Thornton model, Has Invariant sites plus discrete Gamma model). The tree was further annotated by iTOL (Interactive Tree Of Life).

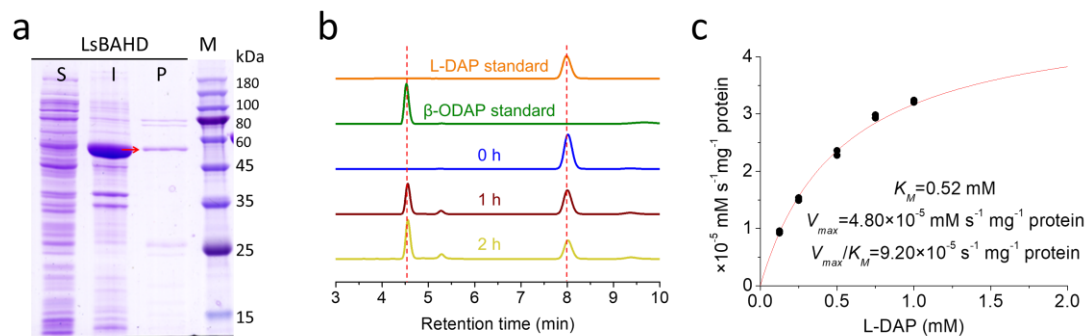

**Supplementary Figure 6. Biochemical analysis of LsBAHD.** **a** SDS-PAGE analysis of nickel-affinity purified LsBAHD. This experiment was repeated independently twice with similar results. **b** The *in vitro* assay substrates and products were monitored by HPLC analysis. A PanE-LsBAHD coupling assay was used due to the chemical oxalyl-CoA is not commercially available. From top to bottom are L-DAP standard,  $\beta$ -ODAP standard and the reaction at 0 h, 1 h and 2 h, respectively. **c** Kinetic analysis of LsBAHD over a gradient of L-DAP concentrations ( $n=2$ , data distribution is less than 1.97% in duplicate experiments). Enzyme activity was determined by measurement the production of NADPH at 340 nm. M, marker II; S, soluble fraction; I, insoluble fraction; P, purified protein. Source data are provided as a Source Data file.

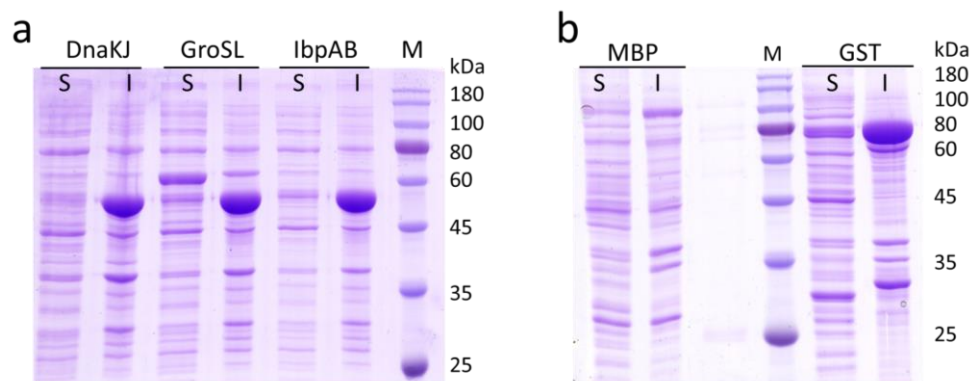

**Supplementary Figure 7. Solubility optimization of LsBAHD by conventional methods.** Expression levels of **a** LsBAHD co-expressed with DnaKJ, GroSL and IbpAB and **b** fusion enzymes (MBP: maltose-binding protein-LsBAHD and GST: glutathione S-transferase) were identified through SDS-PAGE analysis. M, marker II; S, soluble fraction; I, insoluble fraction. This experiment was repeated independently twice with similar results. Source data are provided as a Source Data file.



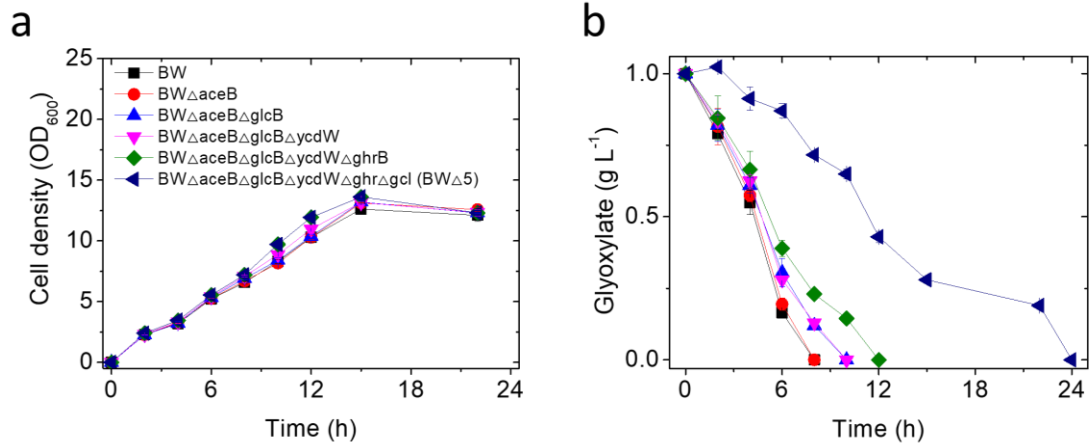

**Supplementary Figure 8. Block the degradation pathways of glyoxylate. a** Cell growth with time. **b** Glyoxylate consumption with time. Data shown are mean  $\pm$  SD (n=3 independent experiments). Source data are provided as a Source Data file.

**Supplementary Table 1. Strains used in this study.**

| <b>Strains</b>                 | <b>Description</b>                                                                                             | <b>Source</b>            |
|--------------------------------|----------------------------------------------------------------------------------------------------------------|--------------------------|
| <i>E. coli</i> BW25113         | <i>rrnBT14 ΔlacZWJ16 hsdR514 ΔaraBADAH33 ΔrhaBADLD78</i>                                                       | Coli genome stock center |
| <i>E. coli</i> XL-1 Blue       | <i>recA1 endA1gyrA96thi-1hsdR17supE44relA1lac</i>                                                              | Stratagene               |
| <i>E. coli</i> BL21 Star (DE3) | F <sup>-</sup> <i>ompT hsdS<sub>B</sub> (r<sub>B</sub><sup>-</sup>m<sub>B</sub><sup>-</sup>) gal dcm (DE3)</i> | Invitrogen               |
| BW1                            | BW25113, pZE-sbnAB                                                                                             | This study               |
| BW2                            | BW25113Δ <i>serB</i> , pZE-sbnAB                                                                               | This study               |
| BW3                            | BW25113, pCS-LsBAHD-panE                                                                                       | This study               |
| BW4                            | BW25113, pCS-LsBAHD-ScAAE-Scgloxdh                                                                             | This study               |
| BW5                            | BW25113, pCS-LsBAHD-ScAAE-Fpoah                                                                                | This study               |
| BW6                            | BW25113, pCS-LsBAHD*-panE                                                                                      | This study               |
| BW7                            | BW25113, pCS-LsBAHD*-ScAAE-Scgloxdh                                                                            | This study               |
| BW8                            | BW25113, pCS-LsBAHD*-ScAAE-Fpoah                                                                               | This study               |
| BWΔ5                           | BW25113Δ <i>aceBAglcBAycdWΔghrBAgcl</i>                                                                        | This study               |
| BW9                            | BWΔ5, pCS-LsBAHD*-panE                                                                                         | This study               |
| BW10                           | BWΔ5, pCS-LsBAHD*-ScAAE-Scgloxdh                                                                               | This study               |
| BW11                           | BWΔ5, pZE-sbnAB, pCS-LsBAHD*-panE                                                                              | This study               |
| BW12                           | BWΔ5, pZE-sbnAB, pCS-LsBAHD*-ScAAE-Scgloxdh                                                                    | This study               |
| BW13                           | BW25113, pZE-sbnAB, pCS-LsBAHD*-ScAAE-Fpoah                                                                    | This study               |
| BW14                           | BWΔ5, pZE-sbnAB, pCS-LsBAHD*-ScAAE-Fpoah-Scgloxdh                                                              | This study               |
| BW15                           | BWΔ5Δ <i>serB</i> , pZE-sbnAB, pCS-LsBAHD*-ScAAE-Fpoah-Scgloxdh                                                | This study               |
| BW16                           | BWΔ5Δ <i>serB</i> , pZE-sbnAB, pCS-LsBAHD*-ScAAE-Fpoah-Scgloxdh, pSA-aceA                                      | This study               |

**Supplementary Table 2. Plasmids used in this study.**

| <b>Plasmids</b>                  | <b>Description*</b>                                                         | <b>Source</b> |
|----------------------------------|-----------------------------------------------------------------------------|---------------|
| pZE12-luc                        | P <sub>L</sub> lacO1, <i>colE</i> ori, <i>luc</i> , <i>Amp</i> <sup>R</sup> | Ref. 1        |
| pCS27                            | P <sub>L</sub> lacO1, <i>p15A</i> ori, <i>Kan</i> <sup>R</sup>              | Ref. 1        |
| pSA74                            | P <sub>L</sub> lacO1, <i>pSC101</i> ori, <i>Cl</i> <sup>R</sup>             | Ref. 1        |
| pETDuet-1                        | PT7, <i>pBR322</i> ori, <i>Amp</i> <sup>R</sup>                             | Ref. 2        |
| pMAL-c2x                         | Ptac, <i>pBR322</i> ori, MBP tag, <i>Amp</i> <sup>R</sup>                   | Ref. 3        |
| pGEX-6p-1                        | Ptac, <i>pBR322</i> ori, GST tag, <i>Amp</i> <sup>R</sup>                   | Solarbio      |
| pZE-sbnAB                        | pZE12-luc, <i>sbnA</i> and <i>sbnB</i> from <i>S. aureus</i>                | This study    |
| pET-Fpgloxdh                     | pETDuet-1, <i>Fpgloxdh</i> from <i>F. palustris</i>                         | This study    |
| pET-Scgloxdh                     | pETDuet-1, <i>Scgloxdh</i> from <i>S. cerevisiae</i>                        | This study    |
| pET-Anoah                        | pETDuet-1, <i>Anoah</i> from <i>A. niger</i>                                | This study    |
| pET-Pcoah                        | pETDuet-1, <i>Pcoah</i> from <i>P. chrysogenum</i>                          | This study    |
| pET-Fpoah                        | pETDuet-1, <i>Fpoah</i> from <i>F. palustris</i>                            | This study    |
| pET-Ssoah                        | pETDuet-1, <i>Ssoah</i> from <i>S. sclerotiorum</i>                         | This study    |
| pET-panE                         | pETDuet-1, <i>panE</i> from <i>M. extorquens</i>                            | This study    |
| pET-LsBAHD                       | pETDuet-1, <i>Lsbahd</i> from <i>L. sativus</i>                             | This study    |
| pCS-dnaKJ                        | pCS27, <i>dnaK</i> and <i>dnaJ</i> from <i>E. coli</i>                      | This study    |
| pCS-groSL                        | pCS27, <i>groS</i> and <i>groL</i> from <i>E. coli</i>                      | This study    |
| pCS-ibpAB                        | pCS27, <i>ibpA</i> and <i>ibpB</i> from <i>E. coli</i>                      | This study    |
| pMAL-LsBAHD                      | pMAL-c2x, <i>Lsbahd</i>                                                     | This study    |
| pGEX-LsBAHD                      | pGEX-6p-1, <i>Lsbahd</i>                                                    | This study    |
| pET-LsBAHD*                      | pETDuet-1, <i>Lsbahd</i>                                                    | This study    |
| pCS-LsBAHD-panE                  | pCS27, <i>Lsbahd</i> and <i>panE</i>                                        | This study    |
| pCS-LsBAHD-ScAAE-Scgloxdh        | pCS27, <i>Lsbahd</i> , <i>ScAAE</i> and <i>Scgloxdh</i>                     | This study    |
| pCS-LsBAHD-ScAAE-Fpoah           | pCS27, <i>Lsbahd</i> , <i>ScAAE</i> and <i>Fpoah</i>                        | This study    |
| pCS-LsBAHD*-panE                 | pCS27, <i>Lsbahd</i> * and <i>panE</i>                                      | This study    |
| pCS-LsBAHD*-ScAAE-Scgloxdh       | pCS27, <i>Lsbahd</i> *, <i>ScAAE</i> and <i>Scgloxdh</i>                    | This study    |
| pCS-LsBAHD*-ScAAE-Fpoah          | pCS27, <i>Lsbahd</i> *, <i>ScAAE</i> and <i>Fpoah</i>                       | This study    |
| pCS-LsBAHD*-ScAAE-Fpoah-Scgloxdh | pCS27, <i>Lsbahd</i> *, <i>ScAAE</i> , <i>Fpoah</i> and <i>Scgloxdh</i>     | This study    |
| pSA-aceA                         | pSA74, <i>aceA</i>                                                          | This study    |

\**Amp*<sup>R</sup>, ampicillin resistant; *Kan*<sup>R</sup>, kanamycin resistant; *Cl*<sup>R</sup>, chloramphenicol resistant.

### Supplementary references

1. Lin Y, Sun X, Yuan Q, Yan Y. Extending shikimate pathway for the production of muconic acid and its precursor salicylic acid in *Escherichia coli*. *Metab. Eng.* **23**, 62-69 (2014).
2. Shen X, *et al.* Elevating 4-hydroxycoumarin production through alleviating thioesterase-mediated salicyloyl-CoA degradation. *Metab. Eng.* **42**, 59-65 (2017).
3. Chen Z, Li Y, Sun X, Yuan Q. Improvement of expression level of polysaccharide lyases with new tag GAPDH in *E. coli*. *J. Biotechnol.* **236**, 159-165 (2016).
