# Supplementary material for: Biosynthesis of plant hemostatic dencichine in Escherichia coli
Source: PubMed Central journal article supplement (PMC9485241; doi:10.1038/s41467-022-33255-3), 2022-09-19
Supplement: 41467_2022_33255_MOESM3_ESM.pdf [file 41467_2022_33255_MOESM3_ESM.pdf]

File Name: Supplementary Data 1

Description: ESI-MS results of  $\beta$ -ODAP standard and sample.

File Name: Supplementary Data 2

Description: Oligonucleotides used in this study.
